# Supplementary material for: The gas-phase reaction between silylene and 2-butyne: kinetics, isotope studies, pressure dependence studies and quantum chemical calculations
Source: Royal Society of Chemistry journal article supplement (doi:10.1039/b823109e), 2009-01-01
Supplement: b823109e.pdf [file b823109e.pdf]

## Supplementary Information

### The gas-phase reaction between silylene and 2-butyne: kinetics, isotope studies, pressure dependence studies and quantum chemical calculations.

Rosa Becerra, J. Pat Cannady, Guy Dormer and Robin Walsh

#### Contents

**Table S1** Calculated enthalpies (Hartrees) for several species by various different methods

**Table S2** Molecular and transition state parameters for RRKM calculations for 2,3-dimethylsilirene-d<sub>2</sub> decomposition at 612 K

**Table S3** Temperature dependent parameters used in RRKM calculations for 2,3-dimethylsilirane-d<sub>2</sub> decomposition

#### Note on Collision Numbers and references

**Table S4** Some Lennard-Jones parameters

**Table S5** Lennard-Jones collision efficiencies at 298K for some addition reactions of SiH<sub>2</sub>

**Fig. S1** Second order plots for reaction (H), SiH<sub>2</sub> + MeC≡CMe, at 10 Torr (He) at three temperatures (indicated).

**Fig. S2** Comparison of RRKM theoretical curves with experiment for pressure dependence of SiH<sub>2</sub> + MeC≡CMe → 2,3-dimethylsilirene in both He (filled symbols) and SF<sub>6</sub> (open symbols) at 429 K and several different energy removal parameters ( $\langle\Delta E\rangle_{\text{down}}/\text{cm}^{-1}$ ), as indicated.

**Fig. S3** Pressure dependence of second order rate constants for reaction (D), SiD<sub>2</sub> + MeC≡CMe, in the presence of SF<sub>6</sub> at five temperatures (indicated).

**Table S1** Calculated enthalpies (Hartrees) for several species by various different methods

| Species              | G3B3        | G3MP2       | G3Q         | CBS-Q       | CBS-QB3     |
|----------------------|-------------|-------------|-------------|-------------|-------------|
| SiH <sub>2</sub>     | -290.454684 | -290.172922 | -290.453102 | -290.16017  | -290.161403 |
| 2-butyne             | -155.830293 | -155.678744 | -155.823469 | -155.648155 | -155.647968 |
| 2,3-dimethylsilirene | -446.367031 | -446.933128 | -446.359864 | -445.894405 | -445.892620 |

**Table S2** .(see next page)

**Table S3** Temperature dependent parameters used in RRKM calculations for 2,3-dimethylsilirane-d<sub>2</sub> decomposition

|                                                                                                             | <i>T</i> /K |      |      |      |      |
|-------------------------------------------------------------------------------------------------------------|-------------|------|------|------|------|
|                                                                                                             | 296         | 368  | 430  | 523  | 612  |
| TSa wavenumbers <sup>a</sup> /cm                                                                            | 41          | 46   | 49   | 54   | 56   |
|                                                                                                             | 35          | 41   | 43   | 47   | 49   |
|                                                                                                             | 35          | 40   | 42   | 46   | 48   |
|                                                                                                             | 33          | 38   | 41   | 44   | 46   |
| Z <sub>LJ</sub> (SF <sub>6</sub> )/10 <sup>-10</sup> cm <sup>3</sup> molecule <sup>-1</sup> s <sup>-1</sup> | 4.61        | 4.75 | 4.87 | 5.04 | 5.20 |

<sup>a</sup> Obtained by scaling SiD<sub>2</sub> and ring stretch modes (588, 513, 500, 484 cm<sup>-1</sup>) by same factors as for 2,3-dimethylsilirene (paper, Table 7).

**Table S2** Molecular and transition state parameters for RRKM calculations for 2,3-dimethylsilirene-d<sub>2</sub> decomposition at 612 K

|                                                                     | 2,3-dimethylsilirene-d <sub>2</sub> | TSa(d <sub>2</sub> ) |
|---------------------------------------------------------------------|-------------------------------------|----------------------|
| $\tilde{\nu}/\text{cm}^{-1}$                                        | 2917(1)                             | 2917(1)              |
|                                                                     | 2914(3)                             | 2914(3)              |
|                                                                     | 2858(1)                             | 2858(1)              |
|                                                                     | 2855(1)                             | 2855(1)              |
|                                                                     | 1656(1)                             | 1656(1)              |
|                                                                     | 1524(1)                             | 1524(1)              |
|                                                                     | 1515(1)                             | 1515(1)              |
|                                                                     | 1455(1)                             | 1455(1)              |
|                                                                     | 1452(2)                             | 1452(2)              |
|                                                                     | 1451(1)                             | 1451(1)              |
|                                                                     | 1390(1)                             | 1390(1)              |
|                                                                     | 1386(1)                             | 1386(1)              |
|                                                                     | 1199(1)                             | 1199(1)              |
|                                                                     | 1065(1)                             | 1065(1)              |
|                                                                     | 1044(1)                             | 1044(1)              |
|                                                                     | 1040(1)                             | 1040(1)              |
|                                                                     | 1001(1)                             | 1001(1)              |
|                                                                     | 846(1)                              | 715(1)               |
|                                                                     | 715(1)                              | 627(1)               |
|                                                                     | 627(1)                              | 326(1)               |
|                                                                     | 588(1)                              | 308(1)               |
|                                                                     | 513(1)                              | 205(1)               |
|                                                                     | 500(1)                              | 189(1)               |
|                                                                     | 484(1)                              | 116(1)               |
|                                                                     | 326(1)                              | 101(1)               |
|                                                                     | 308(1)                              | 56(1)                |
|                                                                     | 205(1)                              | 49(1)                |
|                                                                     | 189(1)                              | 48(1)                |
|                                                                     | 116(1)                              | 46(1)                |
|                                                                     | 101(1)                              |                      |
| reaction coordinate/cm <sup>-1</sup>                                | 846                                 |                      |
| path degeneracy                                                     | 1                                   |                      |
| $E_0(\text{critical energy})/\text{kJ mol}^{-1}$                    | 186.2                               |                      |
| Collision number (in SF <sub>6</sub> )                              | 5.20                                |                      |
| $Z_{LJ}/10^{-10} \text{ cm}^3 \text{ molecule}^{-1} \text{ s}^{-1}$ |                                     |                      |

### Note on Collision Numbers

Leonard-Jones collision numbers were calculated by the procedure recommended by Troe<sup>S1</sup>. The required parameters are shown in Table S3 below. Since no measurement is possible it was assumed that the LJ parameters for SiH<sub>2</sub> were the same as those for SiH<sub>4</sub><sup>S2</sup>. For CH<sub>3</sub>C≡CCH<sub>3</sub>, the parameters were estimated by comparison with those for related molecules<sup>S2</sup>. These lead to the value of  $5.72 \times 10^{-10} \text{ cm}^3 \text{ molecule}^{-1} \text{ s}^{-1}$ . The calculated collision efficiency is shown, together with those for related reactions<sup>S3</sup>, in Table S4.

### References

- S1. J. Troe, *J. Chem. Phys.*, 1977, **66**, 4758.  
S2. R. C. Reid, J. M. Prausnitz and B. E. Poling, *The properties of Gases and Liquids*, 4<sup>th</sup> edn., McGraw-Hill, New York, 1988.  
S3. R. Becerra and R. Walsh, *J. Organometallic Chem.*, 2001, **636**, 49.

**Table S4** Some Lennard-Jones parameters

| Molecule or reaction                                  | $\sigma/\text{\AA}$ | $(\epsilon/k)\text{K}$ |
|-------------------------------------------------------|---------------------|------------------------|
| SiH <sub>2</sub>                                      | 4.08                | 207.6                  |
| CH <sub>3</sub> C≡CCH <sub>3</sub>                    | 5.18                | 317                    |
| SiH <sub>2</sub> + CH <sub>3</sub> C≡CCH <sub>3</sub> | 4.63                | 256.5                  |

i

**Table S5** Lennard-Jones collision efficiencies<sup>b,c</sup> at 298 K for some addition reactions of SiH<sub>2</sub>

| Substrate                                       | $k^a$ | $Z_{\text{LJ}}^a$ | %Efficiency |
|-------------------------------------------------|-------|-------------------|-------------|
| C <sub>2</sub> H <sub>4</sub> <sup>b</sup>      | 3.5   | 4.92              | 71          |
| C <sub>3</sub> H <sub>6</sub> <sup>b</sup>      | 3.4   | 5.31              | 64          |
| C <sub>2</sub> H <sub>2</sub> <sup>b</sup>      | 4.0   | 4.90              | 82          |
| CH <sub>3</sub> C≡CCH <sub>3</sub> <sup>c</sup> | 4.3   | 5.72              | 75          |

<sup>a</sup> Units:  $10^{-10} \text{ cm}^3 \text{ molecule}^{-1} \text{ s}^{-1}$ .

<sup>b</sup> Reference S3.

<sup>c</sup> This work

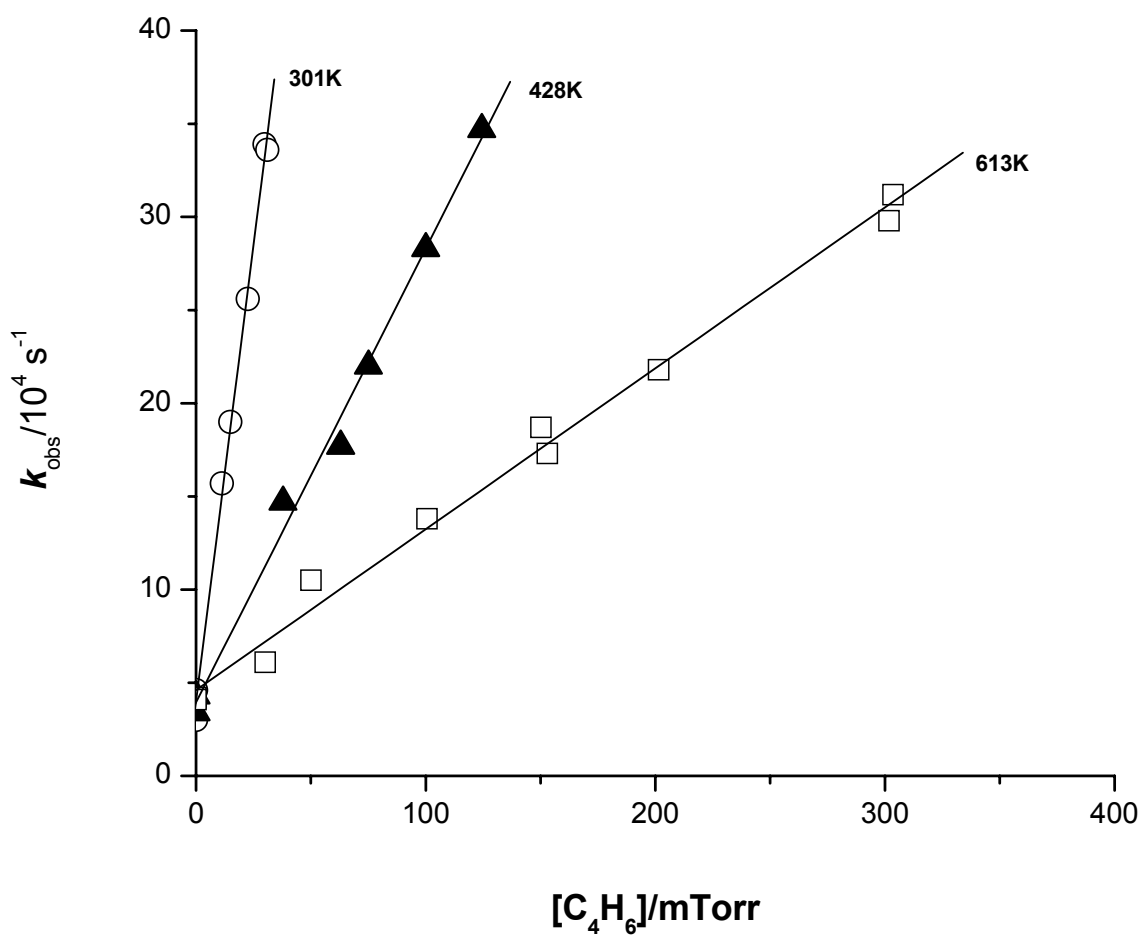

**Fig. S1** Second order plots for reaction (H),  $\text{SiH}_2 + \text{MeC}\equiv\text{CMe}$ , at 10 Torr (He) at three temperatures (indicated).

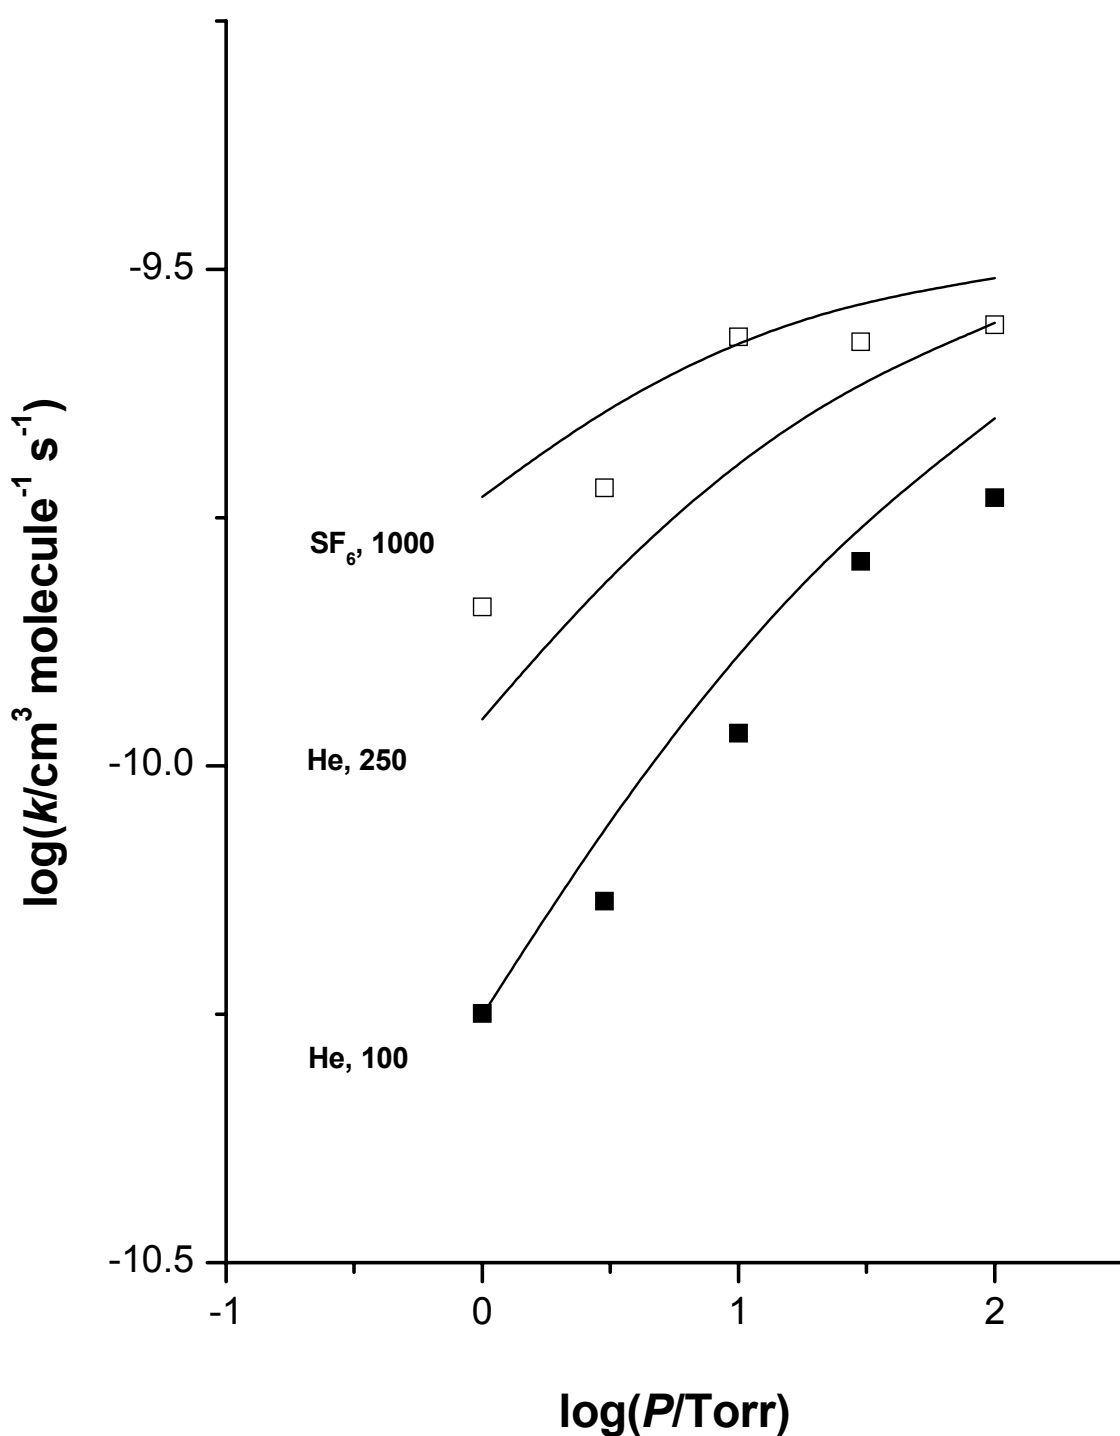

**Fig. S2** Comparison of RRKM theoretical curves with experiment for pressure dependence of  $\text{SiH}_2 + \text{MeC}\equiv\text{CMe} \rightarrow 2,3\text{-dimethylsilirene}$  in both He (filled symbols) and  $\text{SF}_6$  (open symbols) at 429 K and several different energy removal parameters ( $\langle \Delta E \rangle_{\text{down}}/\text{cm}^{-1}$ ), as indicated.

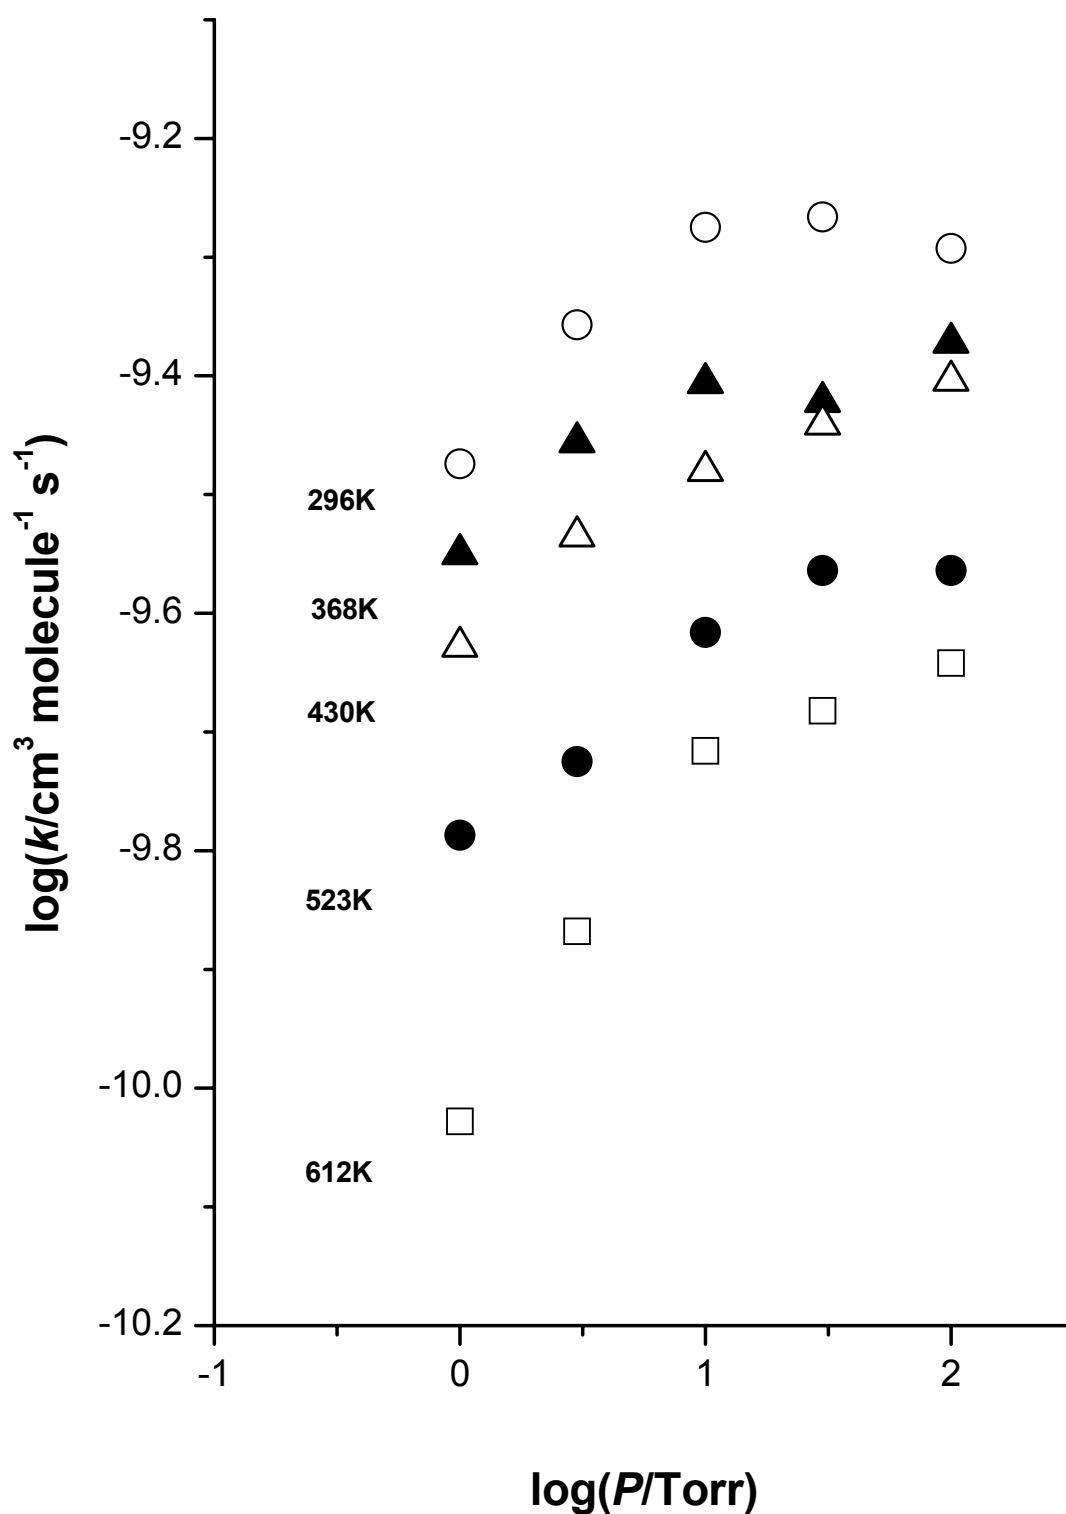

**Fig. S3** Pressure dependence of second order rate constants for reaction (D),  $\text{SiD}_2 + \text{MeC}\equiv\text{CMe}$ , in the presence of  $\text{SF}_6$  at five temperatures (indicated).
